# Supplementary material
Source: PubMed Central journal article supplement (PMC4409934)

# Soufi-Zaret Supp. Figure 1 (related to Figure 1)

**A** Schematic diagram of O, S, K, M and Max protein domain structures.

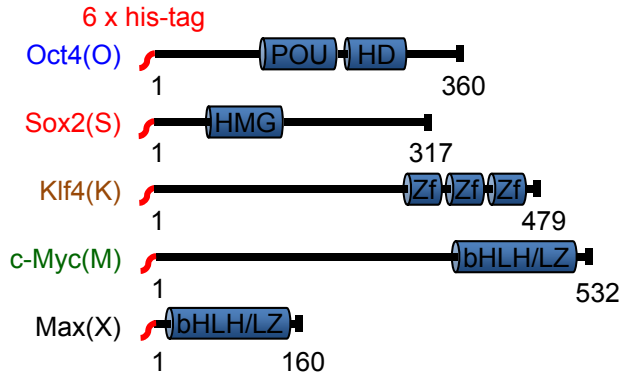

**C** O, S, K, and M: X show less affinity to DNA probes containing non-specific sites

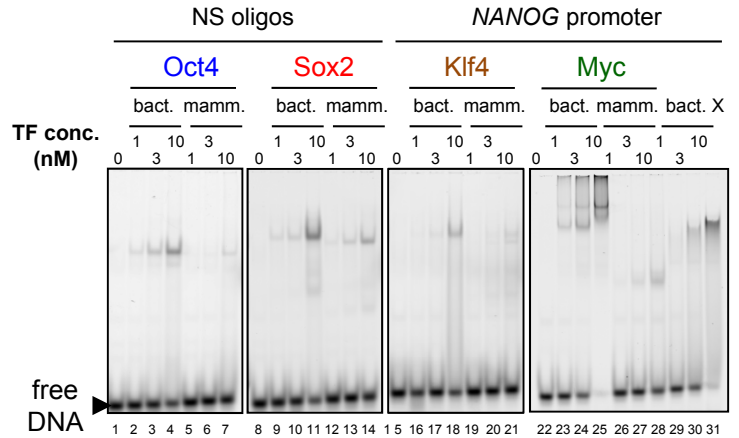

**B** O, S, K, and M: X bind specifically to previously validated DNA targets.

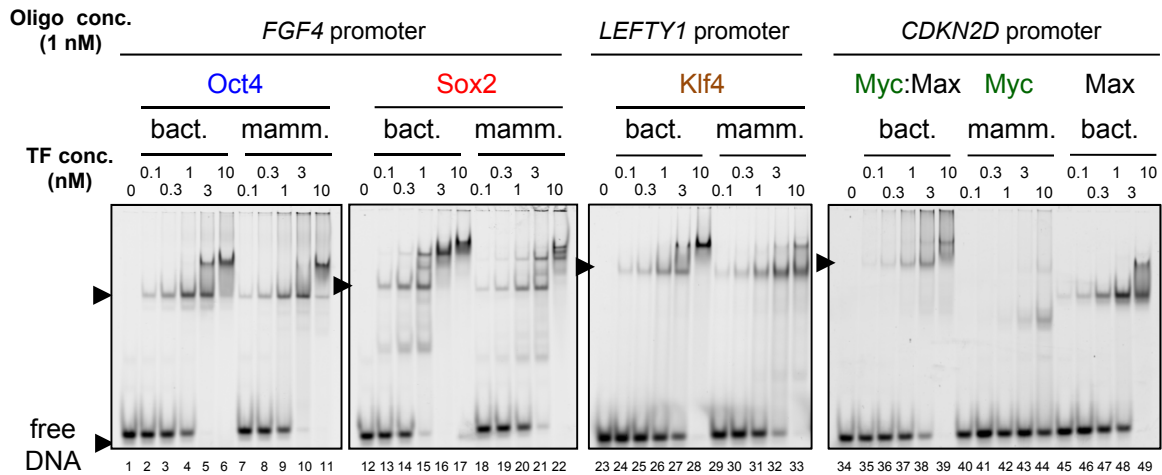

**D** The reconstitution of *LIN28B* nucleosomes *in vitro*

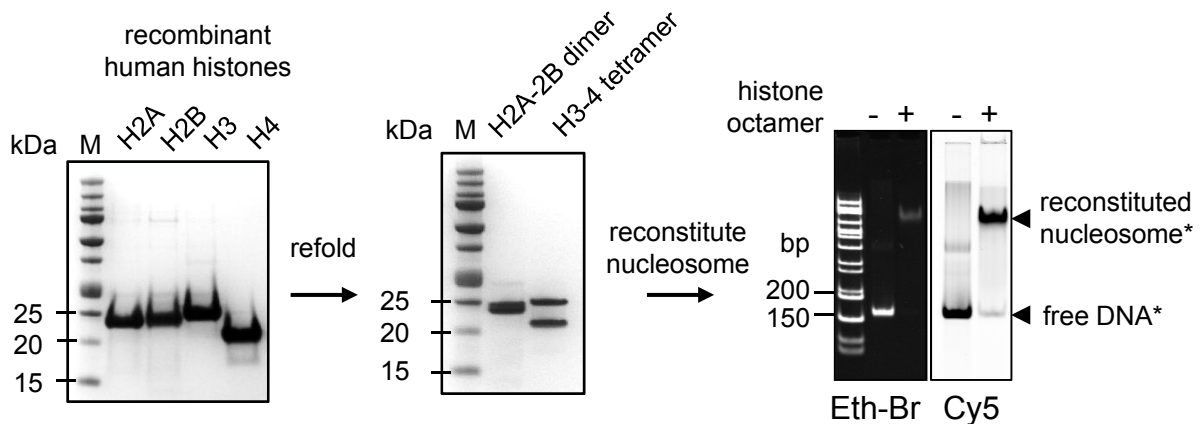

Supplement: NIHMS671621-supplement-1.pdf [file NIHMS671621-supplement-1.pdf]
