# Supplementary material
Source: PubMed Central journal article supplement (PMC4409934)

# Soufi-Zaret Supp. Figure 2 (related to Figure 2)

O, S, K, and M display a range of binding specificities to *LIN28B* nucleosome versus naked DNA *in vitro*

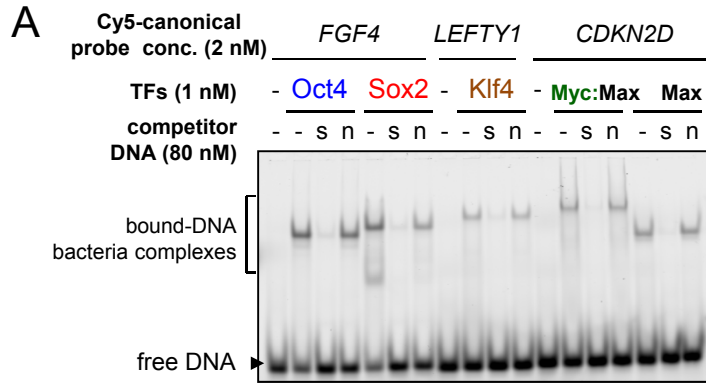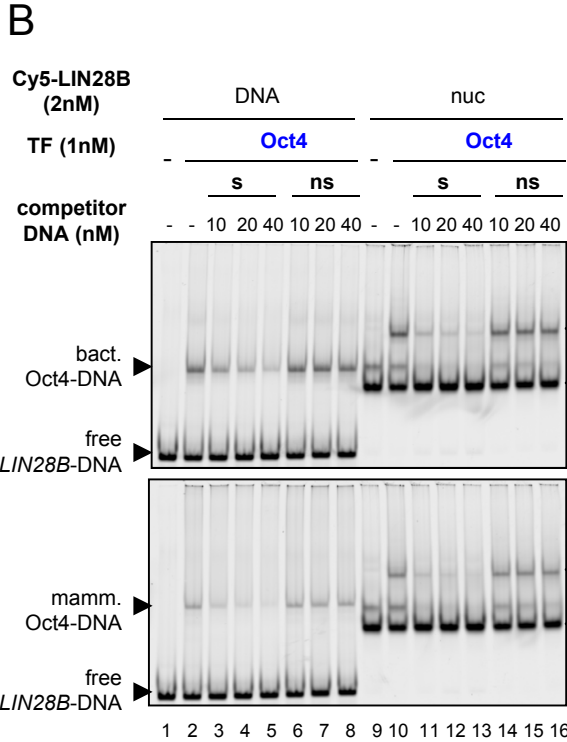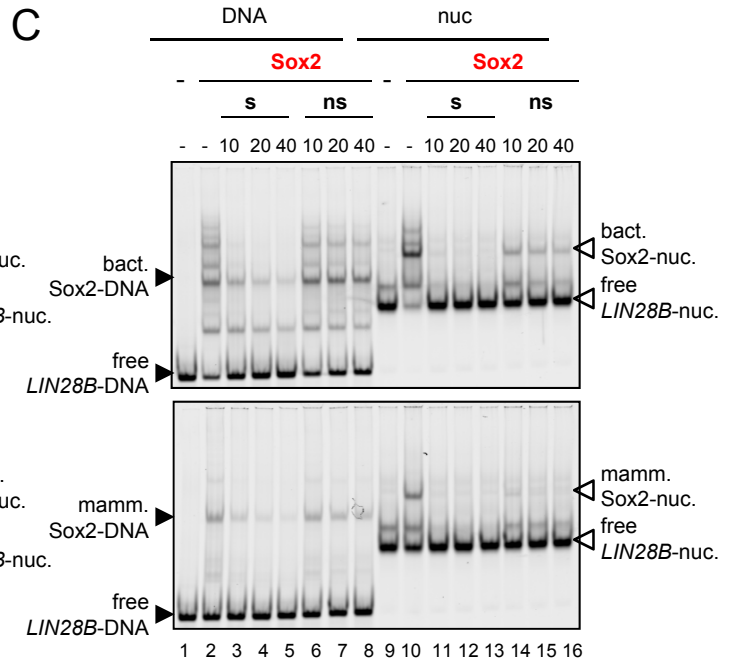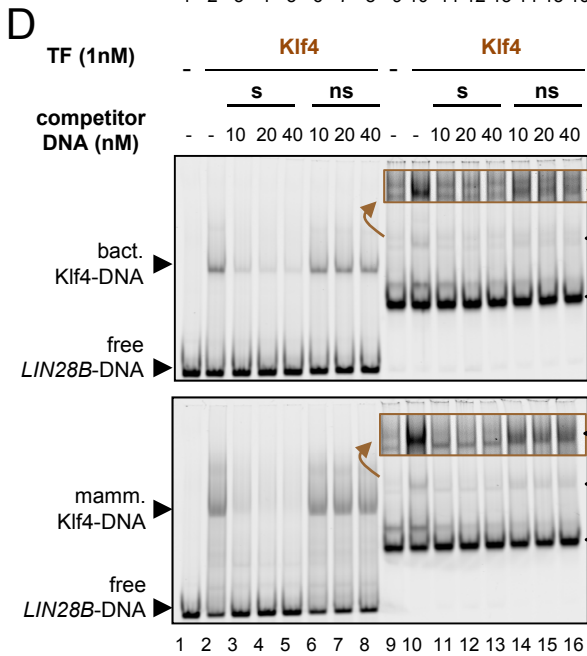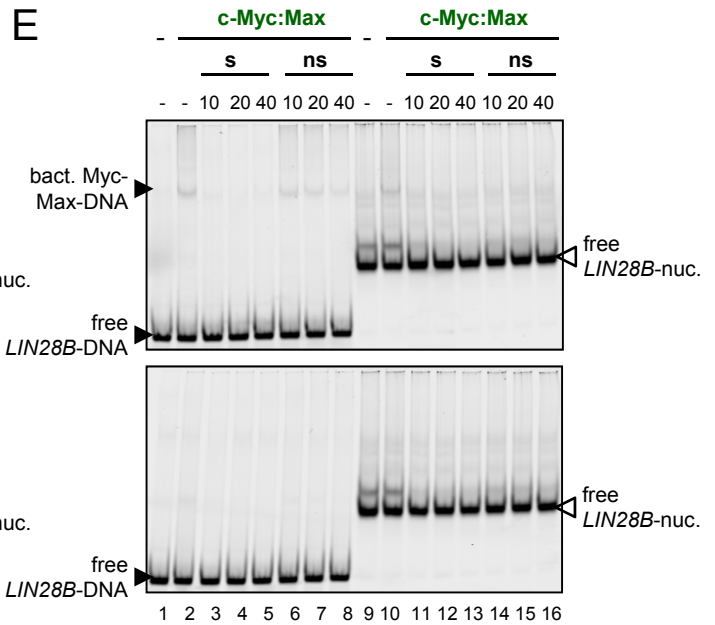

Supplement: NIHMS671621-supplement-2.pdf [file NIHMS671621-supplement-2.pdf]
