# Supplementary material
Source: PubMed Central journal article supplement (PMC4409934)

## Soufi-Zaret Supp. Figure 4 (related to Figure 3)

O, S, K, and M:X bind to nucleosomes containing H3 and H2B histones  
(EMSA-Westerns; WEMSA)

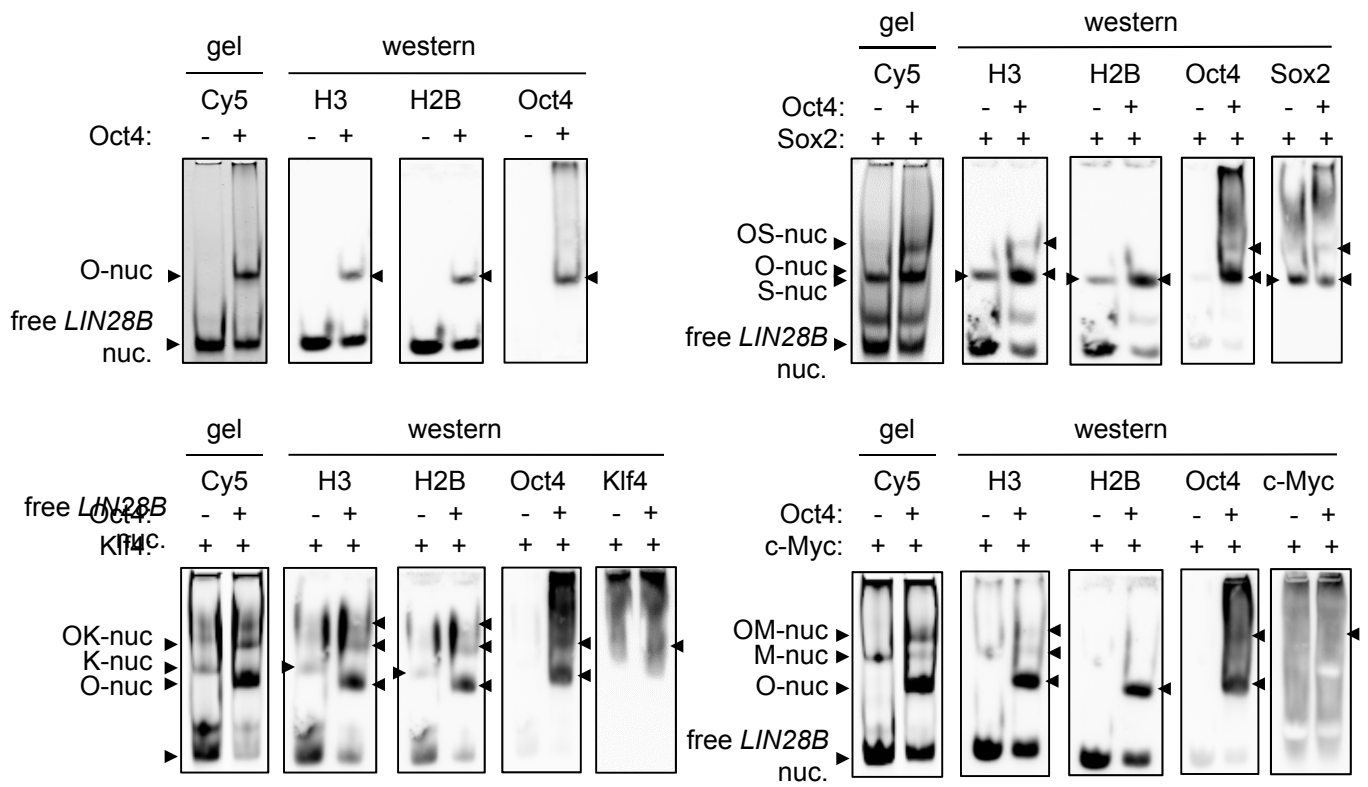

Supplement: NIHMS671621-supplement-4.pdf [file NIHMS671621-supplement-4.pdf]
