# Supplementary material
Source: PubMed Central journal article supplement (PMC4409934)

## Soufi-Zaret Supp. Figure 5 (related to Figure 4)

**A** DNase footprinting shows Klf4 protect one zinc finger site on the forward strand and two zinc finger sites on the reverse strand of LIN28B free DNA

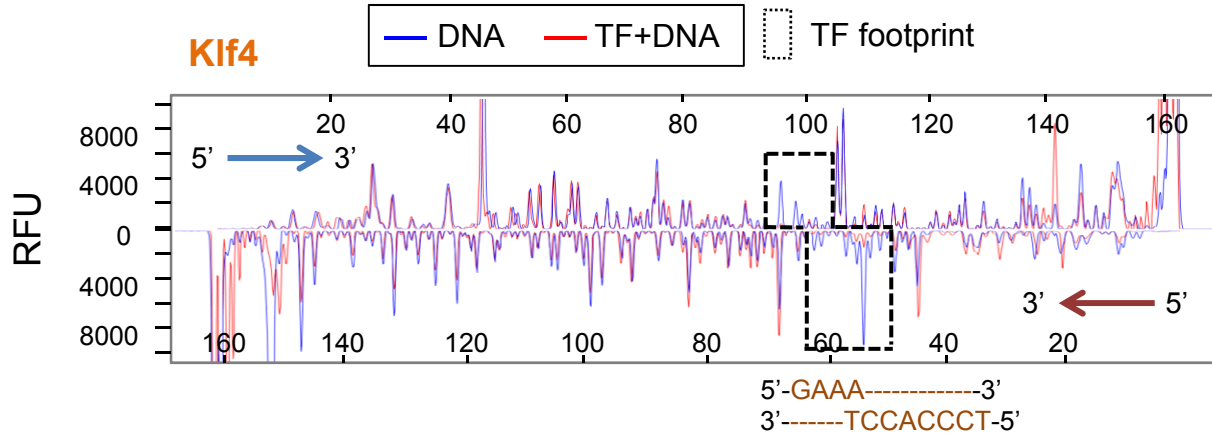

The apparent flexibility of O, S, and K DBDs allows nucleosome-compatible targeting

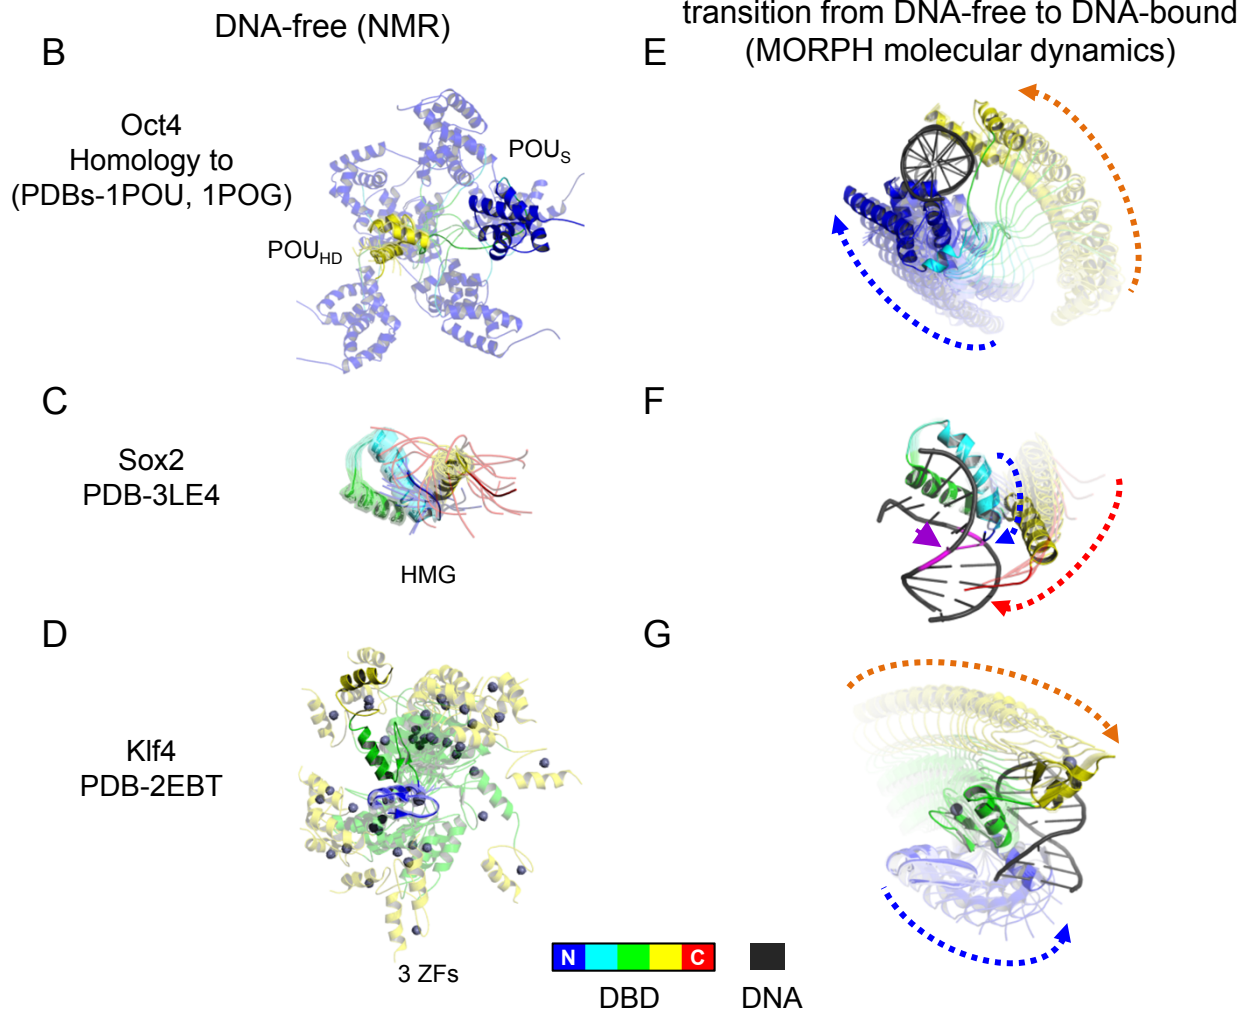

Supplement: NIHMS671621-supplement-5.pdf [file NIHMS671621-supplement-5.pdf]
