# Supplementary material
Source: PubMed Central journal article supplement (PMC4409934)

## Soufi-Zaret Supp. Figure 7 (related to Figure 6)

Variable bipartite DBDs lay on free DNA with different orientations, covering the DNA surface to different extents.

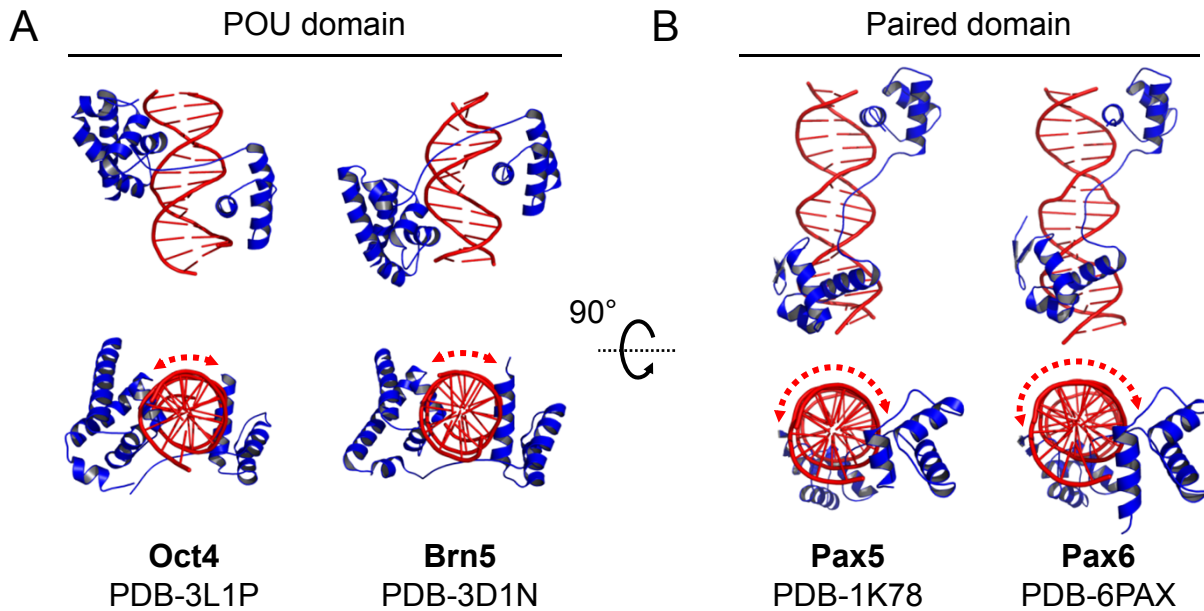

**C** The apparent flexibility of the bipartite PAX DBD is due to its linker region

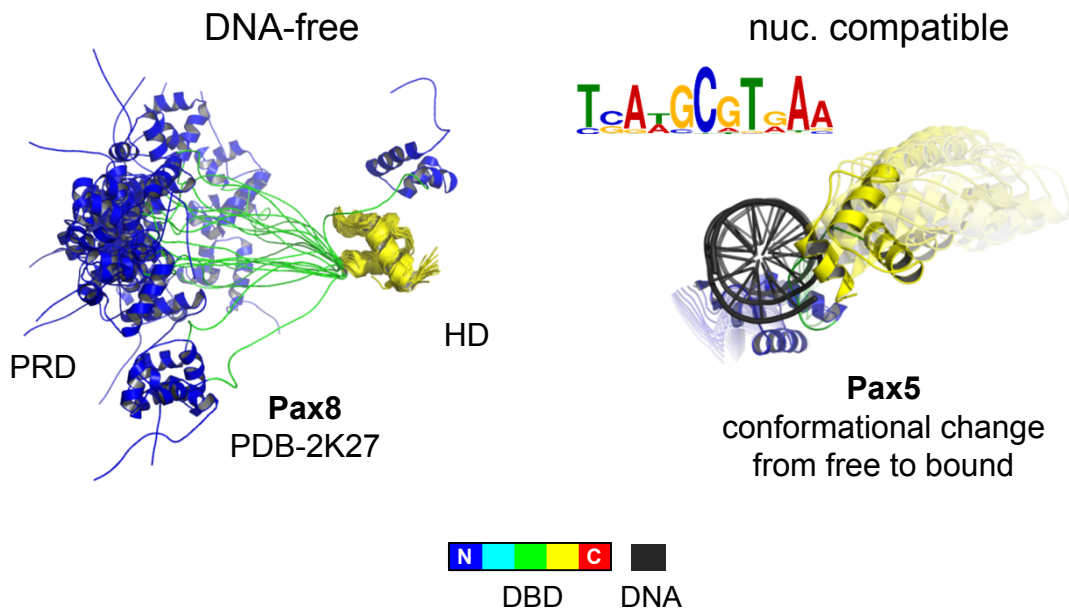

Supplement: NIHMS671621-supplement-7.pdf [file NIHMS671621-supplement-7.pdf]
