# Supplementary material
Source: PubMed Central journal article supplement (PMC4409934)

## Soufi-Zaret Supp. Figure 3 (related to Figure 3)

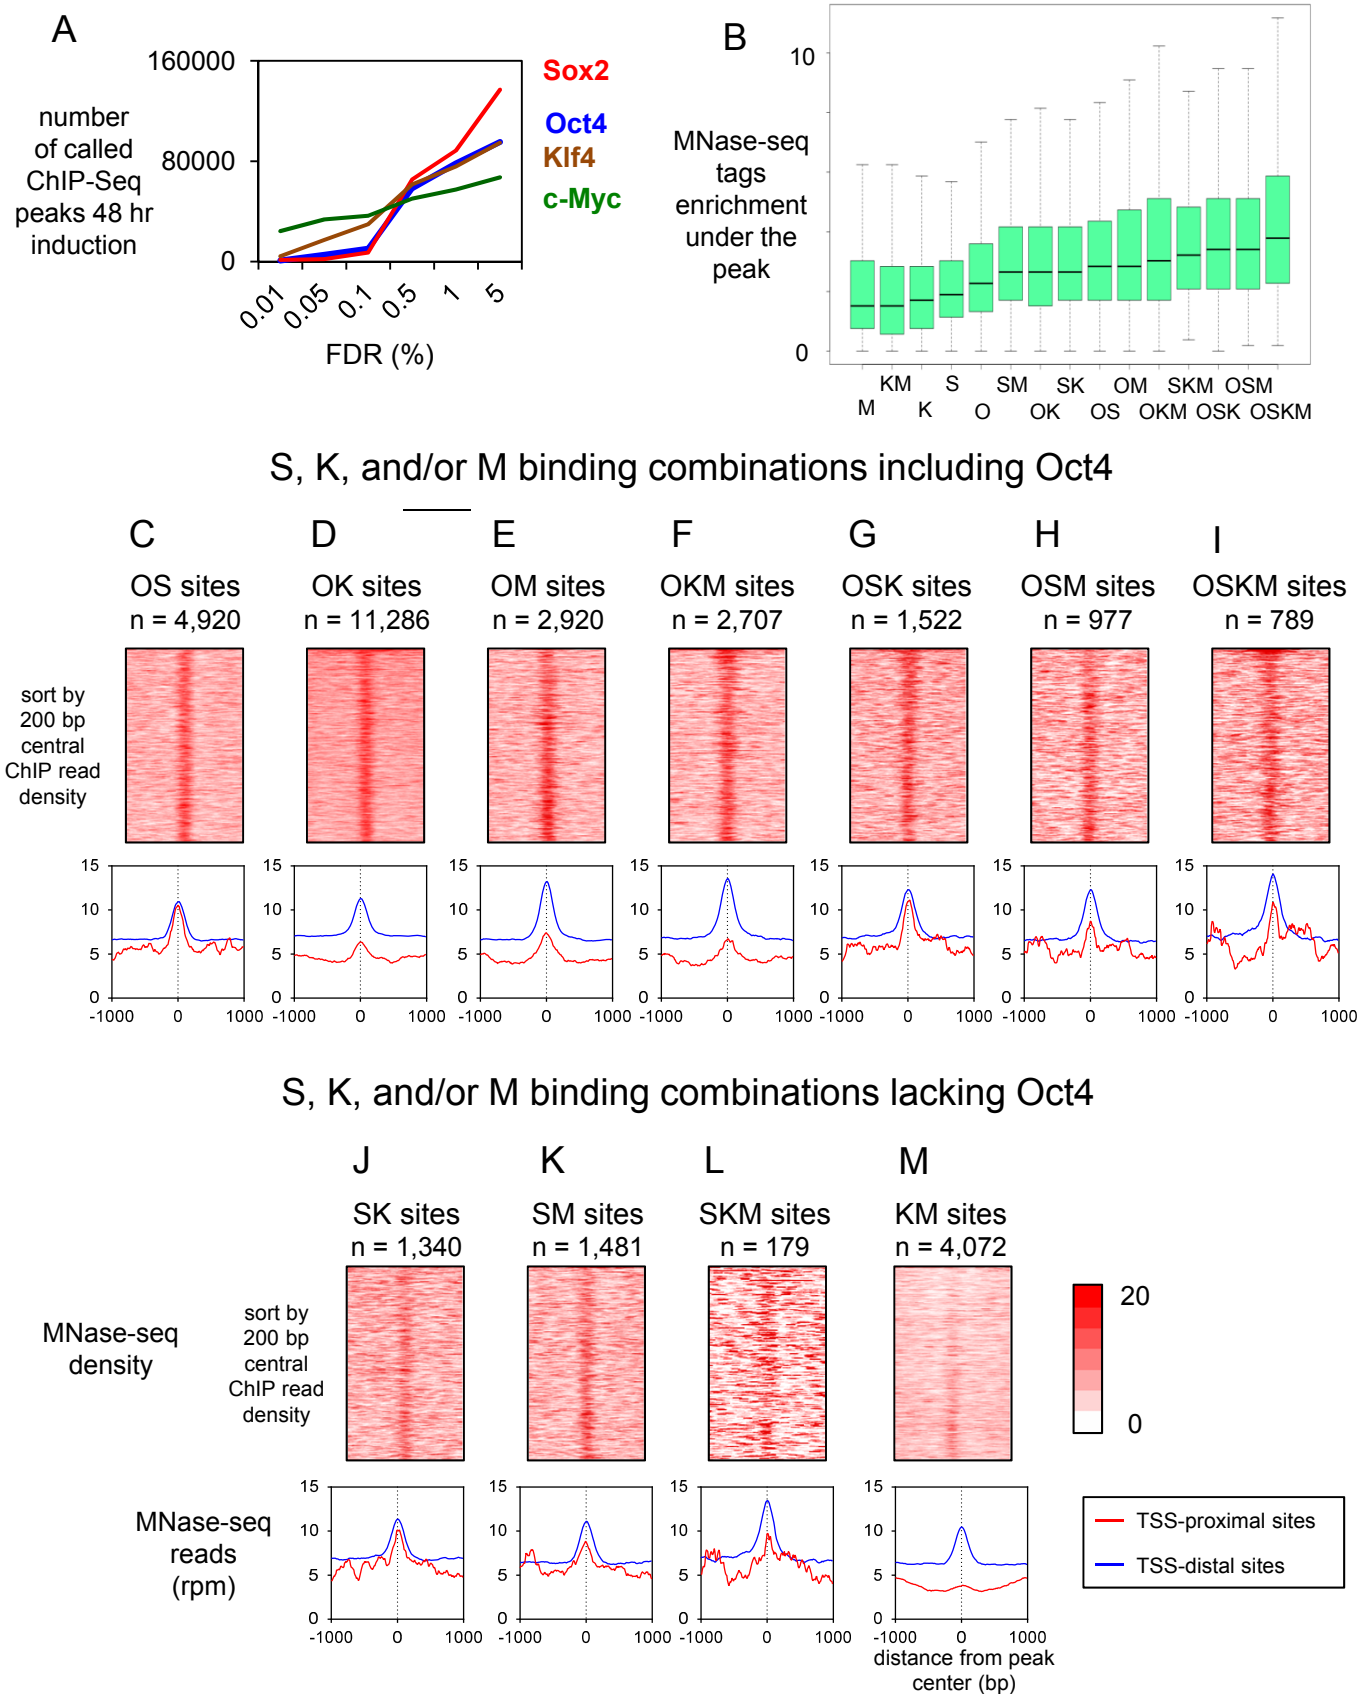

Supplement: NIHMS671621-supplement-3.pdf [file NIHMS671621-supplement-3.pdf]
